# Supplementary material
Source: ML conference proceedings conference paper supplement (https://openreview.net/forum?id=t3Xj7YD7fL)
Supplement: supplementary_material [file attachment]

## 1 Source of ESG Topic

| Pillars     | Themes                             | Key Issues                                              | Source        |
|-------------|------------------------------------|---------------------------------------------------------|---------------|
| Environment | Climate change                     | Carbon emissions                                        | CSI           |
| Environment | Climate change                     | Response to climate change                              | CDP           |
| Environment | Natural capital                    | Water resources                                         | CDP           |
| Environment | Natural capital                    | Biodiversity                                            | CDP           |
| Environment | Natural capital                    | Land use                                                | GRI           |
| Environment | Natural capital                    | Raw materials                                           | GRI           |
| Environment | Natural capital                    | Energy and resource consumption                         | GRI           |
| Environment | Sustainable development management | Waste management                                        | GRI           |
| Environment | Sustainable development management | Green finance                                           | CSI           |
| Environment | Sustainable development management | Clean technology                                        | GRI           |
| Environment | Sustainable development management | Green building                                          | New indicator |
| Environment | Sustainable development management | Environmental policy                                    | CSI           |
| Environment | Sustainable development management | Sustainable certified                                   | CSI           |
| Environment | Sustainable development management | Environment penalizes                                   | CSI           |
| Social      | Product responsibility             | Product quality                                         | CSI           |
| Social      | Product responsibility             | Data Safety                                             | MSCI          |
| Social      | Product responsibility             | Chemical safety                                         | CDP           |
| Social      | Product responsibility             | Responsible Investment                                  | GRI           |
| Social      | Stakeholders                       | Employees                                               | CSI           |
| Social      | Stakeholders                       | Customers                                               | GRI           |
| Social      | Stakeholders                       | Promotion Employment                                    | GRI           |
| Social      | Stakeholders                       | Supply chain management                                 | SASB          |
| Social      | Stakeholders                       | Public Welfare and Volunteer service                    | GRI           |
| Social      | Stakeholders                       | Rural assistance                                        | New indicator |
| Social      | Stakeholders                       | Anti-epidemic                                           | New indicator |
| Governance  | Corporate governance               | Technology innovation                                   | MSCI          |
| Governance  | Corporate governance               | Organizational structure and operation                  | GRI           |
| Governance  | Corporate governance               | Information Disclosure and Communication with investors | Bloomberg     |
| Governance  | Corporate governance               | Audit                                                   | SASB          |
| Governance  | Business ethics                    | Reporting system                                        | SASB          |
| Governance  | Business ethics                    | Shareholder and creditor rights                         | SASB          |
| Governance  | Business ethics                    | Legal proceedings and external sanctions                | MSCI          |
| Governance  | Business ethics                    | Anti-illegitimate competition                           | SGF           |
| Governance  | Business ethics                    | Property protection                                     | MSCI          |
| Governance  | Business ethics                    | Tax transparency                                        | SASB          |
| Governance  | Business ethics                    | Anti-corruption and anti-money laundering               | CSI           |

Table 1: ESG Topics and Key Issues.

<sup>2</sup> We establish the ESG topics and key issues according to the standards of internationally recognized third-party organizations, including the Global Reporting Initiative (GRI)<sup>1</sup> [1], the Sustainability

<sup>1</sup><https://www.globalreporting.org/>

4 Accounting Standards Board Foundation (SASB)<sup>2</sup> [5], the Carbon Disclosure Project (CDP)<sup>3</sup> [3],  
 5 Morgan Stanley Capital International (MSCI)<sup>4</sup> [2], Bloomberg<sup>5</sup> [6], the China Securities Index  
 6 (CSI)<sup>6</sup> [9], and SynTao Green Finance (SGF)<sup>7</sup> [10]. Additionally, in line with the regulatory  
 7 requirements for ESG report disclosures by listed companies, and considering both the contextual  
 8 background and the actual content disclosed by these companies, we include categories such as Green  
 9 Building, Rural Assistance, and Rural Education as new indicators.

## 10 2 Model details

|                      | LERT   | PERT   | BERT   | RoBERTa<br>(base) | RoBERTa<br>(large) | LLaMA 2 |
|----------------------|--------|--------|--------|-------------------|--------------------|---------|
| Hidden               | 768    | 768    | 768    | 768               | 1024               | 4096    |
| Layer                | 12     | 12     | 12     | 12                | 24                 | 4       |
| Attention head       | 12     | 12     | 12     | 12                | 16                 | 32      |
| Trainable params     | 0.1M   | 0.1M   | 0.1M   | 0.1M              | 0.2M               | 0.4M    |
| All params           | 0.1B   | 0.1B   | 0.1B   | 0.1B              | 0.3B               | 1.03B   |
| Trainable params (%) | 0.10%  | 0.10%  | 0.07%  | 0.09%             | 0.07%              | 0.04%   |
| runtime(s)           | 429.20 | 802.32 | 981.80 | 965.78            | 1107.13            | 5623.03 |

Table 2: Model detail.

11 All the foundational models utilized in this research are derived from the Chinese pre-trained models  
 12 provided by HFL on the Hugging Face. The Chinese pre-training corpus encompasses a wide array  
 13 of data resources, including but not limited to Chinese Wikipedia dump, encyclopedia, community  
 14 question answering, and news articles. For detailed information and access to resources, please refer  
 15 to <https://huggingface.co/hfl>.

16 In terms of trainable parameters in table Table 2, LLaMA2 boasts 2M trainable parameters, far  
 17 exceeding the others, yet it has the lowest percentage of trainable parameters at just 0.03%.

## 18 3 Dataset details

19 In the quality classification task, figure Figure 1 demonstrates that the distribution of qualitative text  
 20 significantly dominates the dataset, surpassing other texts by a considerable margin. The proportion  
 21 of irrelevant text is relatively minimal, aligning closely with the structural composition of ESG  
 22 reports. In the ESG reports, irrelevant text such as ‘In case of discrepancies between the English and  
 23 Chinese versions, the Chinese version shall prevail’ and ‘Please provide an overall evaluation of this  
 24 report’ constitutes only a minor share, while the majority of the content is predominantly qualitative.

25 Figure Figure 2 presents the dataset distribution for the topic classification task. To ensure accuracy  
 26 and reliability in the ESG topic classification, we have labeled a minimum of 25 sentences for each  
 27 topic.

<sup>2</sup><https://sasb.ifrs.org/>

<sup>3</sup><https://www.cdp.net/en>

<sup>4</sup><https://www.msci.com/>

<sup>5</sup><https://www.bloomberg.com/>

<sup>6</sup><https://www.csindex.com.cn/en#/>

<sup>7</sup><https://www.syntaogf.com/>

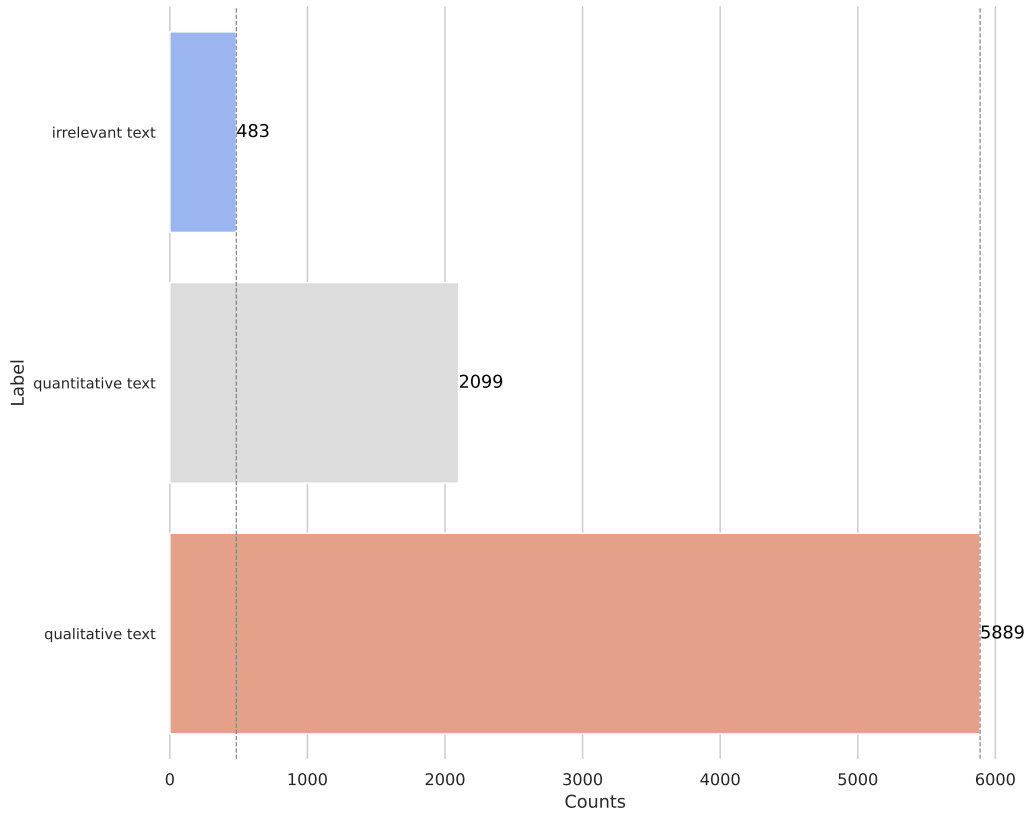

Figure 1: Distribution of qualitative text.

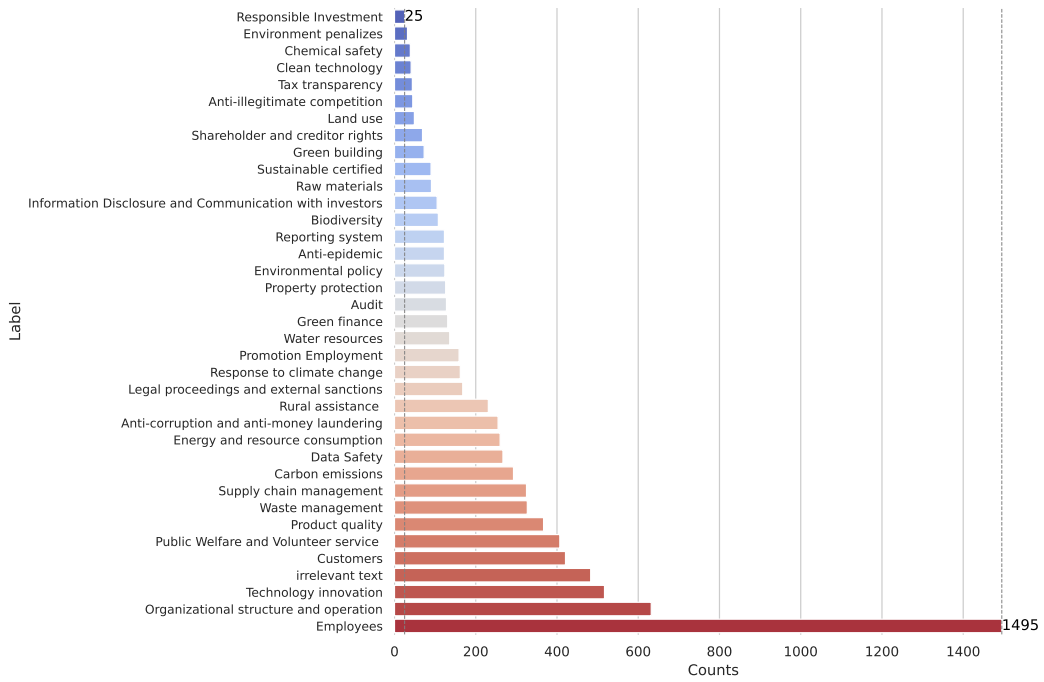

Figure 2: Distribution of topic text.

28 **4 PEFT results**

|           | LoRA                 | P-tuning    | Prompt-tuning(soft) | Prompt-tuning (hard) |
|-----------|----------------------|-------------|---------------------|----------------------|
| Config    | $r = 4, \alpha = 32$ | tokens = 10 | tokens = 10         | prompt 3             |
| Precision | 83.56%               | 81.42%      | 78.37%              | 85.25%               |
| Recall    | 77.72%               | 75.22%      | 71.22%              | 80.08%               |
| F1        | 80.01%               | 77.14%      | 73.66%              | 81.54%               |
| Accuracy  | 84.89%               | 83.17%      | 80.64%              | <b>85.66%</b>        |

Table 3: Different PEFT performance on LLaMA2.

29 We leverage Parameter-Efficient Fine-Tuning methods such as Prompt-Tuning [7], LoRA [4] and  
 30 P-Tuning [8]. We conducted a comparative analysis of the performance of different PEFT methods  
 31 based on LLaMA2. As shown in Table 3, we tested four fine-tuned configurations on the topic  
 32 classification task. Employing various fine-tuning strategies on the LLaMA2 model has a marginal  
 33 impact on performance. In this experiment, the Prompt-tuning (hard) method stood out, achieving  
 34 the highest accuracy at 85.66%.

35 **5 Prompt design**

Prompt 1: Classify the ESG report text by topic.

Prompt 2: The ESG report comprises 3 first-level indicators, 7 second-level indicators indicators, and 36 third-level indicators. As a logical ESG report analyst, you classify the ESG text according to the third-level indicators.

Prompt 3: The ESG report comprises 3 first-level indicators, 7 second-level indicators, and 36 third-level indicators, organized in a tree structure:Environment: Climate Change: [Response to Climate Change, Carbon Emissions], Natural Capital: [Land Use, Biodiversity, Raw Materials, Energy and Resource Consumption, Water Resources], Sustainable Development Management: [Clean Technology, Sustainable Certification, Green Finance, Environmental Penalties, Green Building, Waste Management, Environmental Policy], Social: Product Responsibility: [Data Safety, Product Quality, Responsible Investment, Chemical Safety], Stakeholders: [Employees], Stakeholders: [Supply Chain Management, Employment Promotion, Rural Assistance, Public Welfare and Volunteer Service, Customers and Consumers, Anti-Epidemic Measures], Governance: Corporate Governance: [Audit, Organizational Structure and Operation, Technological Innovation, Information Disclosure and Investor Communication], Business Ethics: [Intellectual Property Protection, Legal Litigation and External Sanctions, Anti-Unfair Competition, Whistleblower System, Shareholder and Creditor Rights, Anti-Corruption and Anti-Money Laundering, Tax Transparency]. As a logical ESG report analyst, you classify the ESG text according to the third-level indicators.

Prompt 4: Classify the ESG report text by quality.

Prompt 5: As a logical analyst of ESG reports, you classify the quality of ESG texts into three categories: quantitative texts, which include numerically quantified ESG content; qualitative texts, referring to descriptive ESG narratives; and irrelevant texts, such as indexes, English sections, and other non-essential ESG content.

Prompt 6: The keywords related to ESG are:Environment: Climate Change: [Response to Climate Change, Carbon Emissions], Natural Capital: [Land Use, Biodiversity, Raw Materials, Energy and Resource Consumption, Water Resources], Sustainable Development Management: [Clean Technology, Sustainable Certification, Green Finance, Environmental Penalties, Green Building, Waste Management, Environmental Policy], Social: Product Responsibility: [Data Safety, Product Quality, Responsible Investment, Chemical Safety], Stakeholders: [Employees], Stakeholders: [Supply Chain Management, Employment Promotion, Rural Assistance, Public Welfare and Volunteer Service, Customers and Consumers, Anti-Epidemic Measures], Governance: Corporate Governance: [Audit, Organizational Structure and Operation, Technological Innovation, Information Disclosure and Investor Communication], Business Ethics: [Intellectual Property Protection, Legal Litigation and External Sanctions, Anti-Unfair Competition, Whistleblower System, Shareholder and Creditor Rights, Anti-Corruption and Anti-Money Laundering, Tax Transparency]. As a logical ESG report analyst, you classify the ESG text into two quality categories: (1) Quantitative text related to ESG that contains numerical quantification, (2) Qualitative text related to ESG that is descriptive.

Figure 3: The prompts used in this work.

36 The design of prompts is pivotal in training language models, particularly in specialized domains. We  
 37 incorporate the ESG tree’s structure into the prompts to enhance classification accuracy.

38 In the "Topic classification prompt design," we structured the prompts to guide the model through  
 39 a hierarchical framework of ESG indicators. This framework includes 3 first-level indicators, 7  
 40 second-level indicators, and 36 third-level indicators. This detailed structure ensures that the model  
 41 captures the comprehensive scope of ESG topics, facilitating accurate classification.

42 Similarly, the "Quality classification prompt design" focuses on distinguishing between irrelevant,  
 43 qualitative, and quantitative texts. This differentiation is crucial for evaluating the completeness and  
 44 integrity of ESG reports.

## 45 6 Visualizations of completeness of ESG reports

### 46 6.1 Visual quality classification

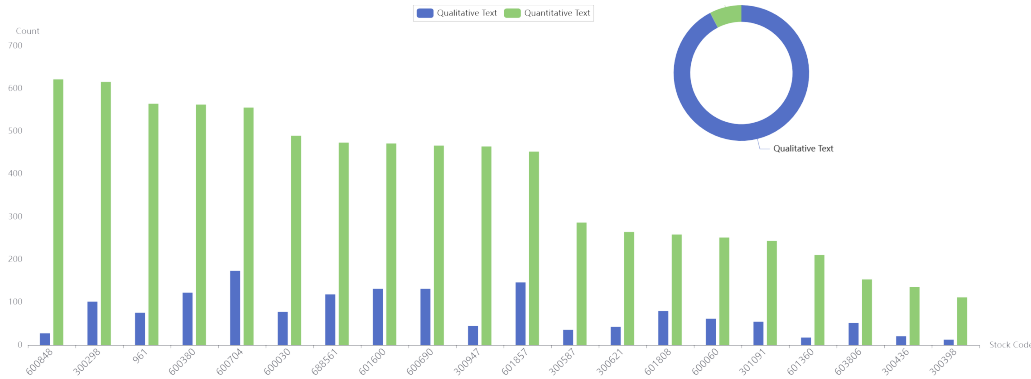

Figure 4: Quality classification prediction on 2022 ESG reports.

47 Figure 4 depicts the distribution of text quality in the 2022 annual reports for 20 stocks, as predicted  
 48 by the fine-tuned LLaMA2. The figure provides a percentage breakdown of the text types across all  
 49 reports, with qualitative text making up the majority, followed by quantitative text, and a minimal  
 50 portion of irrelevant text. Additionally, the visualization is consistent with the description in Appendix  
 51 B: dataset details.

### 52 6.2 Visual reports of stock 000961.

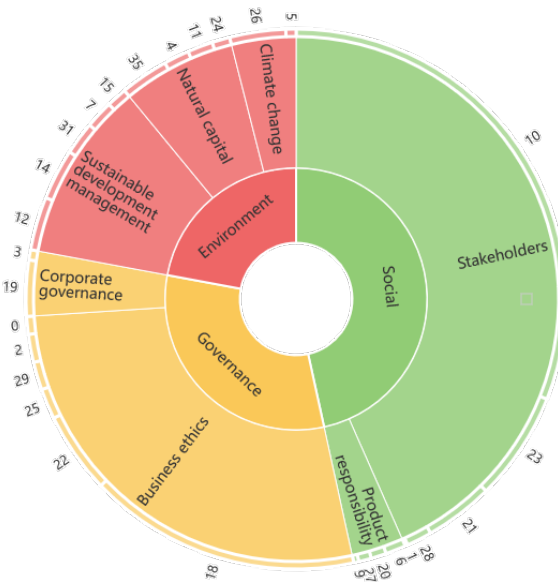

Figure 5: Sunburst on 2022 ESG reports of stock 000961.

53 In Figure 5, we present a topic classification through a sunburst, taking the annual report of stock  
 54 code 000961 as a case to demonstrate the visualization of its Environmental, Social, and Governance

55 (ESG). The sunburst is structured in concentric circles, with the center circle representing the overall  
56 annual report. As the layers expand outward, they reveal a more detailed categorization, such as major  
57 categories including Environment, Social, and Governance, further divided into specific subcategories  
58 like Climate Change and Natural Capital. Different color segments indicate different categories, with  
59 the size of each segment reflecting the frequency of sentences within that category in the annual  
60 report. The company with the stock code 000961 pays greater attention to social and governance.  
61 The sunburst enables quick recognition of key areas and their comparative significance in the ESG  
62 disclosures.

## 63 **References**

- 64 [1] Susanne Arvidsson and John Dumay. Corporate ESG reporting quantity, quality and perfor-  
65 mance: Where to now for environmental policy and practice? *Business Strategy and the*  
66 *Environment*, 31(3):1091–1110, 2022.
- 67 [2] Guglielmo Maria Caporale, Luis Gil-Alana, Alex Plastun, and Inna Makarenko. Persistence in  
68 ESG and conventional stock market indices. *Journal of Economics and Finance*, 46(4):678–703,  
69 2022.
- 70 [3] Nicole Darnall, Hyunjung Ji, Kazuyuki Iwata, and Toshi H Arimura. Do ESG reporting guide-  
71 lines and verifications enhance firms’ information disclosure? *Corporate Social Responsibility*  
72 *and Environmental Management*, 29(5):1214–1230, 2022.
- 73 [4] Edward J Hu, Yelong Shen, Phillip Wallis, Zeyuan Allen-Zhu, Yuanzhi Li, Shean Wang,  
74 Lu Wang, and Weizhu Chen. LoRA: Low-rank adaptation of large language models. In  
75 *International Conference on Learning Representations*, 2022.
- 76 [5] Ruth Jebe. The convergence of financial and ESG materiality: Taking sustainability mainstream.  
77 *American Business Law Journal*, 56(3):645–702, 2019.
- 78 [6] Finja Lena Kind, Jennifer Zeppenfeld, and Rainer Lueg. The impact of chief executive officer  
79 narcissism on environmental, social, and governance reporting. *Business Strategy and the*  
80 *Environment*, 32(7):4448–4466, 2023.
- 81 [7] Brian Lester, Rami Al-Rfou, and Noah Constant. The power of scale for parameter-efficient  
82 prompt tuning. *arXiv preprint arXiv:2104.08691*, 2021.
- 83 [8] Xiao Liu, Kaixuan Ji, Yicheng Fu, Weng Lam Tam, Zhengxiao Du, Zhilin Yang, and Jie Tang.  
84 P-tuning v2: Prompt tuning can be comparable to fine-tuning universally across scales and tasks.  
85 *arXiv preprint arXiv:2110.07602*, 2021.
- 86 [9] Jiqian Wang and Liang Li. Climate risk and Chinese stock volatility forecasting: Evidence from  
87 ESG index. *Finance Research Letters*, 55:103898, 2023.
- 88 [10] Juxian Wang, Mengdi Ma, Tianyi Dong, and Zheyuan Zhang. Do ESG ratings promote corporate  
89 green innovation? A quasi-natural experiment based on syntao green finance’s ESG ratings.  
90 *International Review of Financial Analysis*, 87:102623, 2023.
